# Supplementary material for: Pattern of Plant Community Distribution along the Elevational Gradient and Anthropogenic Disturbance in Gole Forest, Ethiopia
Source: Hindawi journal article supplement (doi:10.1155/2020/6536374), 2020-12-03
Supplement: f1 [file 6536374.f1.xlsx]

## Sheet: Sheet1
plot	Acasen	Achasp	Agasis	Alplon	Arssch	Aspafr	Berere	Bidpac	Budpol	Beraby	Calepi	Carcam	Carnys	Cauaur	Clehir	Conspi	Crereu	Criaby	Cyaber	Cynamp	Cyngeo	Cypade	Cypfis	Cypdic	Cyprot	Digaby	Dispen	Domtor	Dovaby	Dryant	Dryina	Echlon	Ekecap	Eriarb	Eupsch	Fesaby	Ficsur	Galsax	Girbul	Gnarub	Gomint	Guisca	Hagaby	Hapsch	Helfoe	Helfor	Helspl	Hyppep	Hyprev
1	0	0	0	0	3	0	0	0	0	0	0	0	0	0	0	0	3	4	0	0	0	0	3	0	0	0	0	0	0	0	0	0	0	8	0	4	0	0	0	4	0	0	0	3	3	0	4	0	0
2	0	0	0	0	3	0	0	0	0	0	0	0	0	0	0	0	4	0	0	0	0	0	3	0	0	0	0	0	0	0	0	0	0	7	0	0	0	0	0	2	0	0	0	2	4	0	4	0	0
3	0	4	0	0	0	0	0	0	0	0	0	0	0	0	0	3	0	3	0	0	3	0	4	0	0	0	0	0	0	0	2	0	0	6	0	0	0	0	0	0	0	0	3	0	0	0	0	0	2
4	0	0	0	0	0	0	0	0	0	0	0	0	0	0	0	4	2	0	0	0	0	0	3	0	0	0	0	0	0	0	3	0	0	7	0	4	0	0	0	0	0	0	0	3	0	0	0	0	0
5	0	0	0	0	0	0	0	3	0	0	0	0	3	0	0	0	2	3	0	0	0	0	0	0	0	0	3	0	0	0	2	0	0	5	0	2	0	0	0	0	0	0	0	3	0	0	2	0	2
6	0	0	0	0	0	2	0	2	0	0	0	0	0	0	3	0	0	0	3	3	2	0	3	0	0	0	2	0	0	0	0	0	0	5	4	0	0	0	0	0	0	0	2	3	0	3	0	0	3
7	0	0	0	0	0	0	0	2	0	0	0	0	0	0	0	0	0	0	2	4	0	0	2	0	0	0	2	0	0	0	3	0	0	6	0	0	0	0	0	0	0	0	2	2	2	2	0	0	3
8	0	0	0	0	0	0	0	3	0	0	0	0	3	0	0	0	0	0	0	4	2	0	3	0	0	0	2	0	0	0	2	0	0	6	0	0	0	0	0	0	0	0	4	2	0	0	0	0	3
9	0	0	0	0	0	0	0	3	0	0	0	0	4	0	0	0	0	0	0	3	0	0	0	0	0	0	3	0	0	0	4	0	0	5	0	0	0	0	0	0	0	0	2	0	0	2	0	0	2
10	0	0	0	0	0	3	0	3	0	0	0	0	2	0	0	0	0	0	0	1	1	0	0	0	0	0	3	0	0	0	3	0	0	5	3	0	0	0	0	0	0	0	2	3	0	3	0	0	4
11	0	0	0	0	0	0	0	0	0	0	0	0	3	0	0	0	0	0	0	3	0	0	0	0	0	2	2	0	0	0	0	0	0	0	4	0	0	0	0	0	0	0	0	3	0	4	0	0	4
12	0	0	0	0	0	0	0	0	0	0	0	0	2	0	0	0	0	0	0	0	3	0	0	0	0	2	2	0	0	0	0	0	0	2	0	0	0	0	0	0	0	0	0	3	0	4	0	0	5
13	0	0	0	0	0	0	0	0	0	0	0	0	2	0	0	0	0	0	0	0	0	0	2	0	0	0	3	0	0	0	0	0	0	5	0	0	0	0	3	0	0	0	0	2	0	2	0	0	5
14	0	0	0	0	0	3	0	0	0	0	0	0	2	0	4	0	0	0	0	0	0	0	2	0	0	0	3	0	0	0	3	0	0	5	0	0	0	0	3	0	0	0	0	2	0	3	0	0	3
15	0	0	0	0	0	2	0	0	0	0	0	0	3	0	0	0	0	0	0	0	0	0	0	0	0	0	2	0	0	0	3	0	0	5	3	0	0	0	0	0	0	0	2	0	0	4	0	0	5
16	0	0	0	0	0	2	0	2	0	0	0	0	1	0	0	0	0	0	4	0	0	0	0	0	0	0	2	0	0	0	2	0	0	2	3	0	0	0	0	0	0	0	3	3	0	3	0	0	3
17	0	0	0	0	0	0	0	2	0	0	0	0	4	0	0	0	0	0	4	0	0	0	0	0	0	0	2	0	0	0	3	0	0	4	0	0	0	0	0	0	0	0	2	3	0	3	0	0	2
18	0	0	0	0	0	0	0	4	0	0	0	0	4	0	0	0	0	0	4	0	0	0	2	0	0	0	2	0	0	0	3	0	0	0	0	0	0	0	0	0	0	0	1	3	0	0	0	0	5
19	0	0	0	0	0	4	0	4	0	0	0	0	3	0	0	0	0	0	0	0	0	0	2	0	0	1	3	0	0	0	0	0	0	0	0	0	0	0	2	0	0	0	1	3	0	3	0	0	6
20	0	0	0	0	0	2	0	0	0	0	0	0	2	4	0	0	0	0	0	0	0	0	0	0	0	0	3	0	0	0	0	0	0	0	0	0	0	2	0	0	0	0	2	3	0	0	0	0	7
21	0	0	0	0	0	2	0	0	0	0	0	0	2	0	0	0	0	0	0	0	0	0	0	2	0	0	3	0	0	0	0	0	0	0	0	0	0	0	0	0	0	0	2	0	0	3	0	0	5
22	0	0	0	0	0	0	0	0	0	0	0	0	2	0	0	0	0	0	0	0	3	0	0	0	0	0	2	0	0	0	3	3	0	0	0	0	0	0	0	0	0	0	2	0	0	0	0	0	4
23	0	0	0	0	0	2	0	4	0	0	0	0	3	0	0	0	0	0	3	0	0	0	0	0	0	0	2	0	0	0	2	2	0	2	0	0	0	0	0	0	0	0	0	2	0	0	0	0	5
24	0	0	0	0	0	3	0	0	0	0	0	0	3	0	0	0	0	0	0	0	0	0	0	0	0	0	3	0	0	0	0	0	0	0	0	0	0	0	0	0	0	0	5	0	0	4	0	0	5
25	0	3	0	0	0	0	0	0	0	0	0	0	0	2	0	0	0	0	0	0	0	0	0	0	0	0	2	0	0	0	2	0	0	0	0	0	0	0	0	0	0	0	2	0	0	4	0	0	2
26	0	0	0	0	0	0	0	0	0	0	0	0	0	0	0	0	0	0	0	0	0	0	0	0	0	0	4	0	0	0	3	0	0	0	0	0	0	0	0	0	0	0	3	0	0	0	0	0	6
27	0	0	0	0	0	0	0	0	0	0	0	0	2	4	0	0	0	0	0	0	0	0	0	2	0	0	4	0	0	0	0	0	0	0	0	0	0	0	0	0	0	0	3	3	0	0	0	0	4
28	0	2	0	0	0	2	0	0	0	0	0	0	3	0	0	0	0	0	0	2	2	0	0	0	0	0	2	0	0	0	0	0	0	0	0	0	0	1	0	0	0	0	2	0	0	3	0	0	4
29	0	0	0	0	0	0	0	0	0	0	0	0	2	3	0	0	2	0	2	3	0	0	0	0	0	0	4	0	0	0	3	0	0	0	0	0	0	0	0	0	0	0	2	4	0	0	0	0	2
30	0	0	0	0	0	2	0	0	0	0	0	0	4	4	0	0	3	0	0	0	0	0	0	0	0	0	0	0	0	0	0	0	0	0	0	0	0	0	0	0	0	0	3	3	0	3	0	0	0
31	3	0	0	0	0	3	0	0	0	0	2	0	3	2	0	0	0	0	0	3	0	0	0	0	0	0	4	0	0	0	0	0	0	0	0	0	0	1	0	0	0	0	2	3	0	2	0	0	0
32	0	0	0	0	0	2	0	0	0	0	0	0	0	2	2	0	0	0	2	2	0	0	2	0	0	0	0	1	3	0	1	0	0	0	0	0	0	2	0	0	0	0	1	3	0	2	0	0	0
33	0	0	0	0	0	2	0	0	0	0	2	0	0	2	0	0	0	0	0	0	0	0	2	0	0	0	0	0	0	0	0	0	0	0	0	0	0	0	0	0	0	0	0	3	0	2	0	0	0
34	2	0	0	0	0	2	0	0	0	0	0	0	0	3	0	0	0	0	0	3	0	0	3	0	0	0	0	0	2	0	0	0	0	0	0	0	0	0	0	0	0	0	0	0	0	3	0	0	0
35	2	3	0	0	0	0	0	0	0	0	0	0	0	0	0	2	0	0	0	0	0	0	3	0	0	0	0	5	0	0	0	0	0	0	0	0	0	0	0	0	0	0	0	0	0	2	0	0	0
36	0	0	0	0	0	2	0	0	0	0	3	0	0	3	0	0	0	0	0	1	0	0	0	0	4	0	0	0	3	0	0	0	0	0	0	0	0	0	0	0	0	0	0	0	0	2	0	0	0
37	0	0	0	0	0	2	0	0	0	0	0	0	2	0	0	0	0	0	0	0	0	0	0	0	0	0	0	0	3	0	2	0	0	0	0	0	0	2	0	0	0	0	0	0	0	2	0	0	0
38	0	3	0	0	0	0	0	0	0	0	0	0	0	2	0	0	0	0	0	4	0	0	0	0	0	0	0	2	0	0	0	0	0	0	0	0	0	0	0	0	0	0	0	0	0	3	0	0	0
39	0	2	0	3	0	1	0	0	2	0	0	0	2	2	3	0	0	0	0	2	3	0	0	2	0	0	0	5	0	2	2	0	0	0	3	0	0	0	0	0	0	0	0	0	0	3	0	0	3
40	0	0	0	0	0	2	0	0	0	0	0	0	4	2	2	0	0	2	0	4	0	1	0	0	0	0	0	1	3	2	0	0	0	0	0	0	0	0	0	0	0	0	0	0	0	0	0	0	0
41	0	0	0	0	0	2	0	0	0	0	0	0	3	0	0	0	0	0	0	2	2	0	0	0	0	0	0	0	0	3	3	0	2	0	2	0	0	0	0	0	0	0	1	0	0	3	0	0	0
42	0	0	0	2	0	3	0	0	0	0	0	0	3	4	0	0	0	0	0	0	3	0	0	0	0	0	3	0	0	2	2	0	0	0	0	0	0	3	0	0	0	0	2	0	0	2	0	0	0
43	0	0	0	0	0	2	0	0	0	0	2	0	0	2	0	0	0	0	1	0	0	0	0	4	0	0	0	0	6	0	3	0	0	0	0	0	0	0	0	2	2	0	0	4	0	3	0	0	0
44	0	0	0	0	0	2	0	0	0	0	3	0	0	2	4	0	0	0	0	2	0	0	0	4	0	0	0	3	0	0	0	0	0	0	0	0	0	0	0	3	0	0	0	0	0	0	0	0	2
45	0	0	0	0	0	0	0	0	0	0	0	0	0	3	0	0	0	0	0	4	0	0	0	2	0	0	0	0	2	0	0	0	0	0	0	0	0	0	0	0	0	2	0	0	0	2	0	2	0
46	0	0	0	0	0	2	0	3	0	0	0	0	2	0	0	0	0	0	0	0	0	0	0	0	0	0	2	0	0	2	0	0	0	0	2	0	0	1	0	0	0	0	2	4	0	2	0	0	0
47	0	0	0	0	0	0	0	0	0	0	0	0	2	0	0	0	0	0	0	4	0	0	0	0	0	0	0	0	2	3	0	0	0	0	0	0	0	1	0	0	0	0	0	0	0	4	0	0	0
48	0	0	2	0	0	3	0	3	1	0	0	0	0	2	0	0	0	0	0	4	0	0	0	0	0	0	0	0	0	0	0	0	0	0	0	0	0	0	0	0	0	0	0	3	0	4	0	0	0
49	0	0	0	0	0	2	0	0	0	0	0	0	0	0	0	0	0	0	0	0	0	0	0	0	0	0	0	0	3	2	3	0	0	0	0	0	0	1	0	0	0	0	0	0	0	0	0	0	0
50	0	0	0	0	0	2	0	0	0	0	0	0	0	2	0	0	0	0	0	0	4	0	0	2	0	0	0	0	2	0	0	0	0	0	0	0	0	2	4	0	0	0	0	0	0	4	0	0	0
51	0	0	0	0	0	0	0	0	0	0	0	2	0	0	0	0	3	0	0	4	0	0	2	0	0	0	0	0	3	0	0	0	2	0	0	0	0	0	0	0	0	0	0	0	0	4	0	0	0
52	0	0	0	0	0	2	0	0	0	0	0	0	0	1	0	0	0	0	0	0	0	2	0	0	0	0	0	3	3	0	3	0	0	0	0	0	0	2	0	0	0	0	0	0	0	3	0	0	0
53	0	1	0	0	0	0	4	0	0	0	0	0	0	2	2	0	0	0	0	4	0	0	0	0	0	0	0	3	0	2	2	2	0	0	3	0	0	2	0	0	0	0	0	0	0	3	0	0	0
54	0	0	2	0	0	3	0	0	0	0	0	0	0	2	0	0	0	0	0	0	0	2	0	0	0	0	0	0	0	2	3	0	0	1	0	0	0	0	0	0	0	0	0	0	0	0	0	0	0
55	0	3	0	0	0	2	0	0	0	0	0	0	0	0	0	0	0	0	0	4	0	2	0	0	0	0	0	0	3	0	0	0	3	0	0	0	0	0	0	0	0	0	0	0	0	3	0	0	0
56	0	0	0	0	0	3	0	0	0	0	0	0	0	1	0	0	0	0	0	0	0	0	0	0	0	0	0	0	4	0	0	0	0	0	3	0	0	0	0	0	0	0	0	0	0	3	0	0	0
57	0	0	2	0	0	2	0	0	0	4	0	0	0	0	0	0	0	0	0	1	0	0	0	0	0	0	0	0	4	0	0	2	0	0	4	0	0	0	0	0	0	0	0	0	0	2	0	0	0
58	0	0	0	0	0	0	0	0	0	0	0	0	0	0	0	0	0	0	0	2	0	0	0	0	0	0	0	0	2	0	0	0	3	0	0	0	0	3	0	0	0	0	0	0	0	2	0	0	0
59	0	0	0	2	0	1	0	0	0	0	3	0	0	1	3	0	0	0	0	4	0	3	0	0	0	0	0	0	4	0	2	0	1	0	0	0	0	0	0	0	0	0	0	0	0	0	0	0	0
60	0	0	0	0	0	1	0	0	0	0	3	3	0	0	0	0	0	0	2	0	0	0	0	0	0	0	0	0	2	3	0	0	0	0	0	0	0	1	0	0	0	0	0	0	0	2	0	0	0
61	3	0	0	0	0	0	0	0	0	5	2	3	0	0	0	0	0	0	0	0	0	0	0	0	0	3	0	0	3	0	2	0	1	0	0	0	0	1	0	0	0	0	0	3	0	0	0	0	0
62	0	0	0	0	0	0	0	0	0	0	2	0	0	0	0	0	0	0	0	0	0	0	0	0	0	3	0	0	3	0	0	0	0	0	0	0	4	0	0	0	0	0	0	3	0	0	0	0	0
[truncated: 57 more columns]
